# Supplementary material for: Experiences of Postoperative Breast Cancer Patients with Internet-based Nursing Services: A Qualitative Study Using the Technology Acceptance Model and Perceived Risk Theory
Source: Research Square preprint supplement (doi:10.21203/rs.3.rs-7258202/v1), 2025-10-23
Supplement: Supplementary file 2 [file 9c5a27120729f180f7c852a3.docx]

| **Interview Schedule** |
| --- |
| **Questions** |
| What is your comprehension of internet-based nursing technology? |
| In what ways do you believe internet nursing technology can assist with postoperative health management? |
| What specific advantages do you anticipate Internet nursing technology will offer to your health and everyday life? |
| What factors or challenges, in your opinion, could potentially motivate or deter you from adopting internet nursing technology for health management purposes? |
| What factors would you take into account when determining whether to embrace internet nursing technology? |
| Do you have any advice on how to facilitate people's acceptance and utilization of Internet nursing technology? |
| **Additional probing questions** |
| Do you have anything else to add to this point? Do you need further detailed explanation? |
| Can you give us an example? |
|  |
