# Supplementary material for: Experiences of Postoperative Breast Cancer Patients with Internet-based Nursing Services: A Qualitative Study Using the Technology Acceptance Model and Perceived Risk Theory
Source: Research Square preprint supplement (doi:10.21203/rs.3.rs-7258202/v1), 2025-10-23
Supplement: Supplementary file 3 [file d6ea3d791c79005a24d9c642.docx]

Author information

Changlin LIU: Liu-Changlin@hotmail.com

Jing Guo : 523626060@qq.com

Wanting Cai :15182359506@163.com

Liande Tao : 1262388434@qq.com

Lei Luo : 13550703216@163.com
